# Supplementary material for: Residential green space in childhood is associated with lower risk of psychiatric disorders from adolescence into adulthood
Source: PubMed Central journal article supplement — Proc Natl Acad Sci U S A. 2019 Feb 25;116(11):5188–93. doi: 10.1073/pnas.1807504116 (PMC6421415; doi:10.1073/pnas.1807504116), 2019-02-25
Supplement: pnas.1807504116.sapp.pdf [file pnas.1807504116.sapp.pdf]

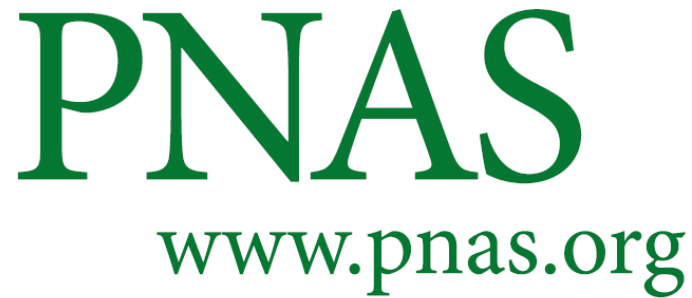

## Supplementary Information for

Childhood green space is associated with lower risk of psychiatric disorders

Engemann, Kristine, Pedersen, Carsten Bøcker, Arge, Lars<sup>6</sup>, Tsirogiannis, Constantinos, Mortensen, Preben Bo, & Svenning, Jens-Christian

Corresponding author: Engemann, Kristine; Section for Ecoinformatics & Biodiversity, Department of Bioscience, Aarhus University, Ny Munkegade 114, DK-8000 Aarhus C, Denmark; telephone: +45 87154316; fax: +45 87154323

Email: [engemann@bios.au.dk](mailto:engemann@bios.au.dk)

### **This PDF file includes:**

Figs. S1 to S4  
Tables S1 to S8

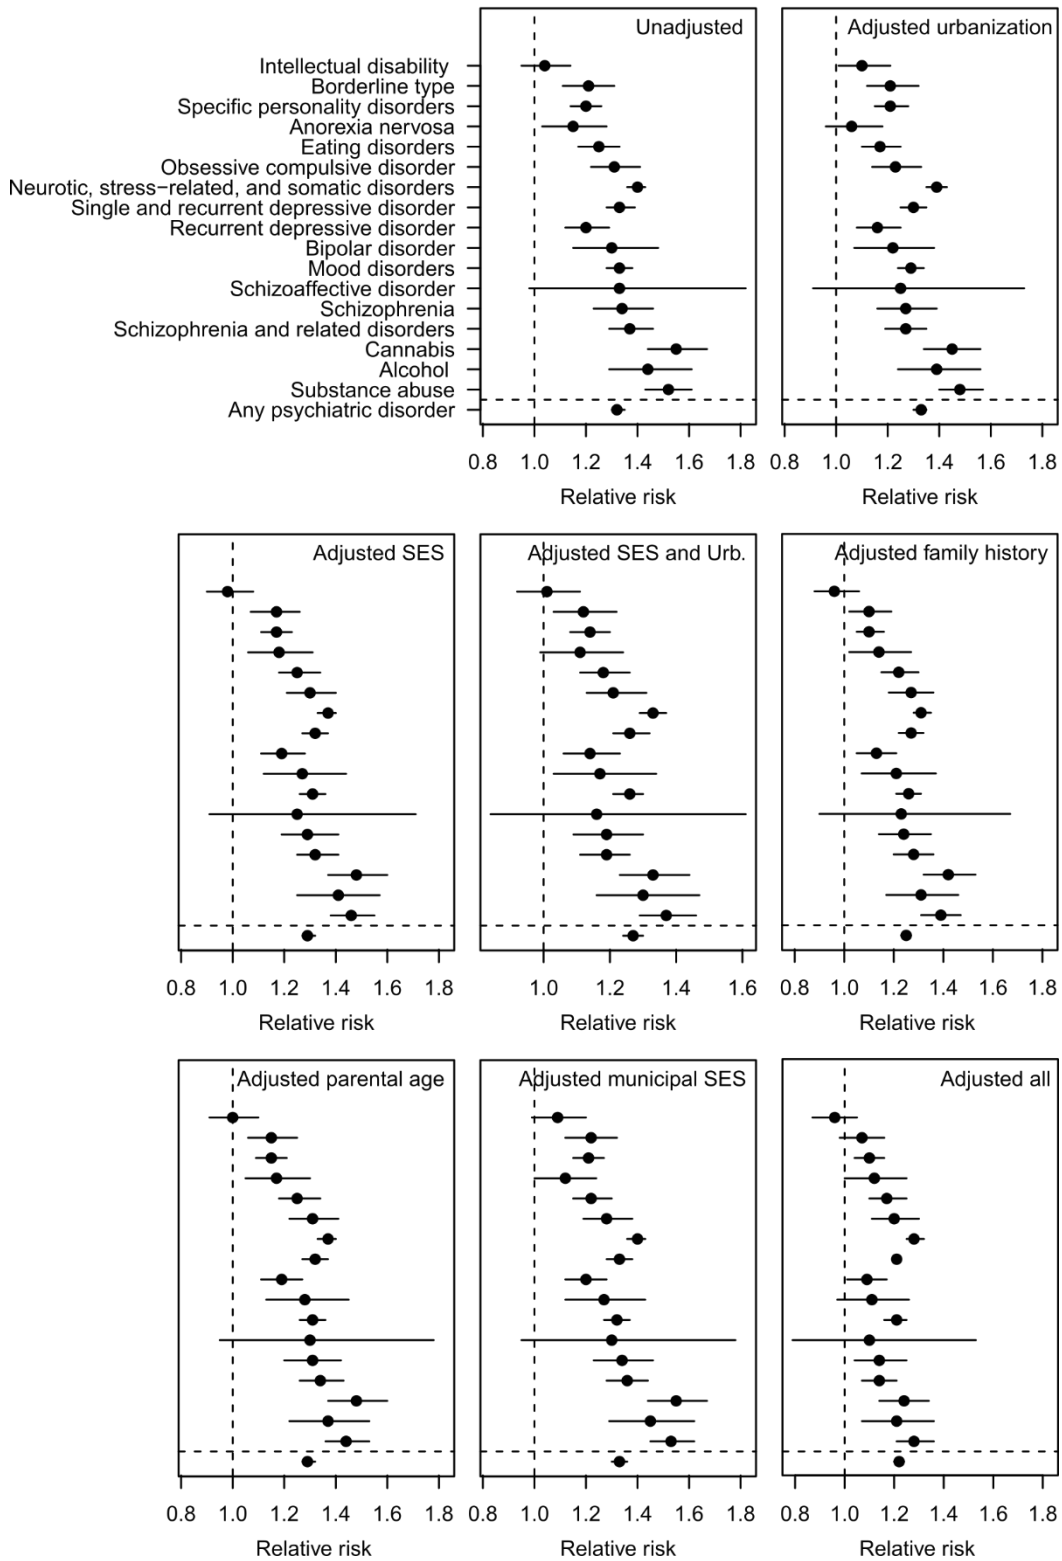

**Fig. S1** Effect of potential confounding factors on the association between childhood green space presence and the relative risk of developing a psychiatric disorder later in

life. Green space presence was measured as the mean normalized difference vegetation index (NDVI) within a 210×210m square around place of residence (N = 943 027). Relative risk estimates are relative to the reference level (set to the highest NDVI decile) for NDVI fitted as numeric deciles in classes of ten. Estimates above the hatched line indicate higher risk of developing a given psychiatric disorder for children living at the lowest compared to the highest decile of NDVI. Seven additional models were fitted to test the potential confounding effects of other known risk factors: urbanization (from rural to capital city centre); parents socioeconomic status (SES); the combined effect of urbanization and SES; family history of mental illness measured as previous diagnosis of any of the psychiatric disorders for one or both parents; parental age at birth; municipal SES; and the combined effect of all of these risk factors. Estimates were adjusted for age, year of birth, and gender and plotted with 95% confidence intervals.

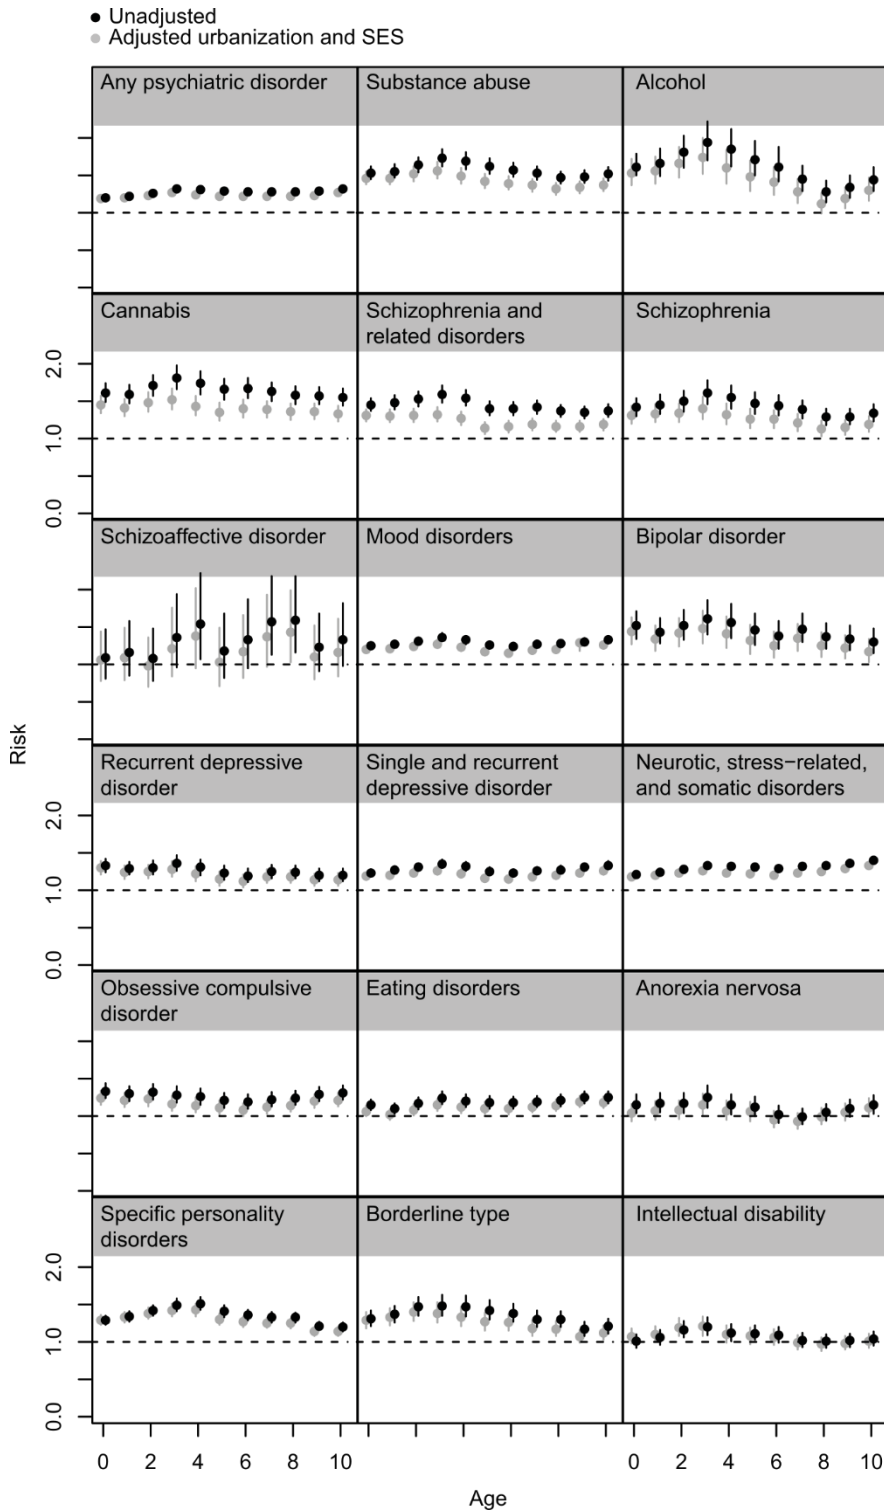

**Fig. S2** Relative risk of developing a psychiatric disorder from adolescence into adulthood for childhood green space presence measured at different ages. Separate models were fitted for each age from birth to the 10<sup>th</sup> birthday (N = 943 027) with mean

NDVI measured each year at place of residence. Additional models were fitted to adjust for urbanization and parental socioeconomic status. Estimates of incidence rate ratio from all models were adjusted for age, year of birth, and gender and plotted with 95% confidence intervals. All estimates are relative to the reference level (set to the highest decile) for NDVI fitted as numeric deciles in classes of ten.

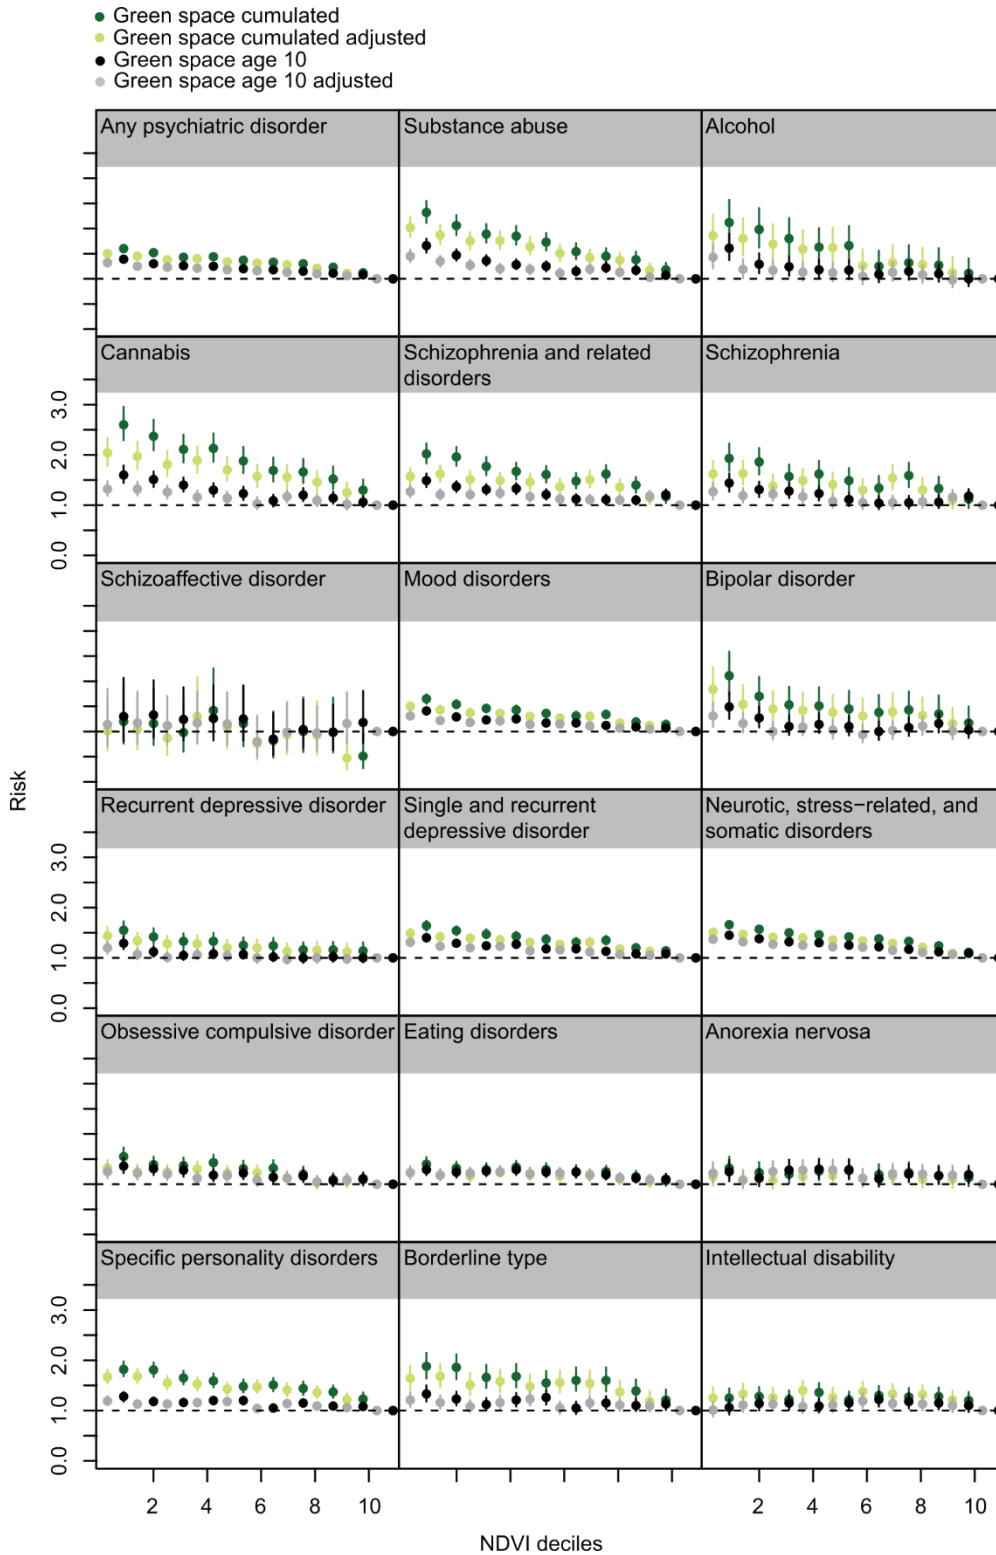

**Fig. S3** The association between the relative risk of developing a psychiatric disorder from adolescence into adulthood and green space presence at age 10 compared to

cumulated green space presence. Two models were fitted for each psychiatric disorder to compare green space presence measured as mean NDVI at the 10<sup>th</sup> birthday (N = 943 027) and the cumulated mean NDVI from birth to the 10<sup>th</sup> birthday (N = 904 295) both at place of residence. Two additional models were fitted to adjust for urbanization and parents' socioeconomic status for each measure of NDVI. Estimates of incidence rate ratio from all models were adjusted for age, year of birth, and gender and plotted with 95% confidence intervals. All estimates are relative to the reference level set to the highest NDVI decile and shown with the same y-axis for easy comparison between disorders.

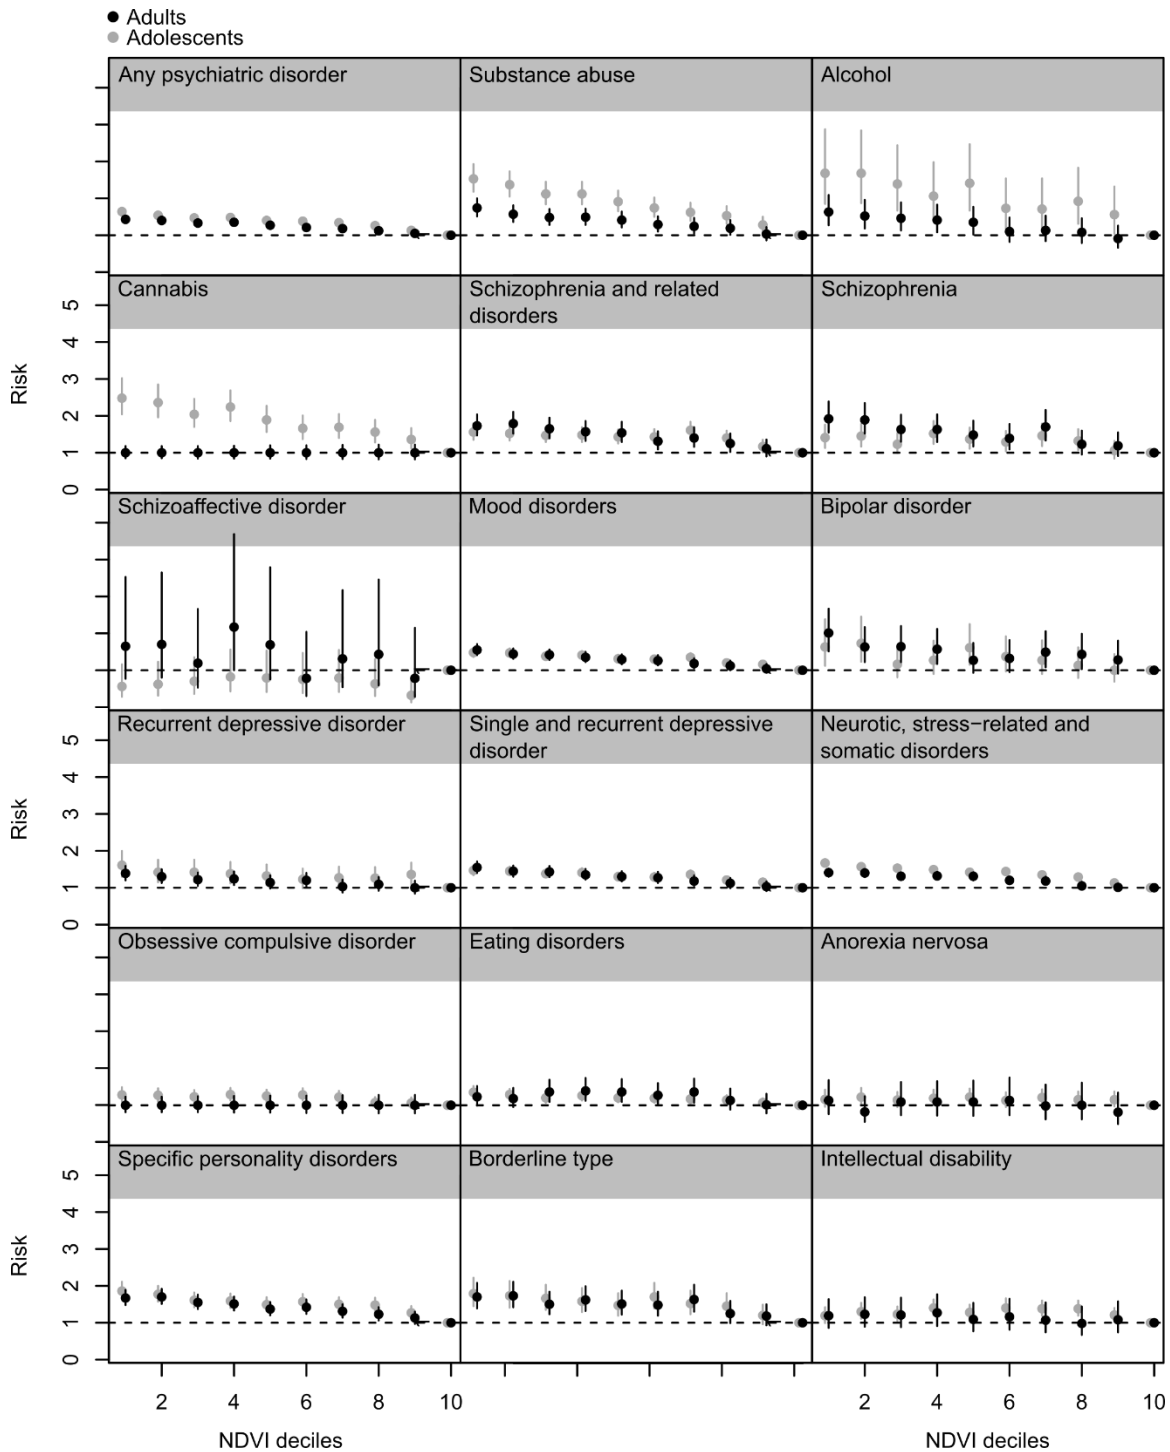

**Fig. S4** The association between green space and relative risk of developing a psychiatric disorder for persons diagnosed in adolescence compared to persons diagnosed in adulthood. Two models were fitted for each psychiatric disorder to compare risk for



persons diagnosed in adolescence (age 13-19) (N =879 364) and for persons diagnosed in adulthood (age >19) (N = 840 177). Green space was measured as the cumulated normalized difference vegetation index (NDVI) from birth to age 10 within a 210×210m square around the place of residence. Both models were fitted to adjust for urbanization and parents' socioeconomic status. Estimates of incidence rate ratio from both models were adjusted for age, year of birth, and gender and plotted with 95% confidence intervals. All estimates are relative to the reference level set to the highest NDVI decile and shown with the same y-axis for easy comparison between disorders. We note that sample sizes for some disorders diagnosed in either adolescence or adulthood were relatively small (Table S3).

**Table S1** Population attributable risk for risk factors of psychiatric disorders

| Psychiatric disorder                            | ICD-10  | NDVI | Urb. | SES_m | SES_f | Fhist_m | Fhist_F | Age_m | Age_f |
|-------------------------------------------------|---------|------|------|-------|-------|---------|---------|-------|-------|
| Any psychiatric disorder                        | F00-F99 | 12   | 2    | 13    | 15    | 10      | 6       | 6     | 3     |
| Substance abuse                                 | F10-F19 | 12   | 7    | 17    | 22    | 13      | 9       | 13    | 5     |
| Alcohol                                         | F10     | 8    | 6    | 17    | 21    | 15      | 9       | 13    | 5     |
| Cannabis                                        | F12     | 9    | 14   | 16    | 23    | 14      | 9       | 9     | 5     |
| Schizophrenia and related disorders             | F20-F29 | 12   | 13   | 1     | 14    | 11      | 8       | 2     | 4     |
| Schizophrenia                                   | F20     | 9    | 1    | 8     | 13    | 11      | 8       | 5     | 4     |
| Schizoaffective disorder                        | F25     | 5    | 3    | -2    | 19    | 14      | 9       | -11   | 12    |
| Mood disorders                                  | F30-F39 | 11   | 5    | 8     | 1     | 10      | 5       | 2     | 3     |
| Bipolar disorder                                | F30-F31 | 4    | 5    | 0     | 4     | 14      | 8       | 0     | 5     |
| Recurrent depressive disorder                   | F33     | 1    | 5    | 4     | 8     | 11      | 6       | 1     | 3     |
| Single and recurrent depressive disorder        | F32-F33 | 11   | 5    | 8     | 10    | 10      | 5       | 2     | 2     |
| Neurotic, stress-related, and somatic disorders | F40-F48 | 15   | 2    | 15    | 15    | 11      | 7       | 4     | 3     |
| Obsessive compulsive disorder                   | F42     | 12   | 8    | 13    | 1     | 7       | 4       | -6    | 2     |
| Eating disorders                                | F50     | 14   | 9    | -8    | -13   | 5       | 2       | -3    | 3     |
| Anorexia nervosa                                | F50.0   | 16   | 8    | -19   | -31   | 4       | 1       | -4    | -1    |
| Specific personality disorders                  | F60     | 8    | 2    | 15    | 19    | 13      | 9       | 12    | 4     |
| Borderline type                                 | F60.31  | 8    | 2    | 19    | 22    | 14      | 10      | 15    | 4     |
| Intellectual disability                         | F70-F79 | 7    | -1   | 26    | 29    | 11      | 8       | 7     | 4     |

NDVI: The normalized difference vegetation index; Urb.: degree of urbanization; SES\_m: Socioeconomic status of the mother;

SES\_f: Socioeconomic status of the father; Fhist\_m: family history of mental illness of the mother; Fhist\_f: family history of mental

illness of the father; Age\_m: age of mother at birth; Age\_f: age of father at birth. Estimates of attributable risk show the percent risk

attributable to each risk factor adjusted for all other risk factors based on incidence rate ratios from separate Cox regressions fitted for

each psychiatric disorder. Negative attributable risks may occur if persons in the reference category do not have lowest risks. In such situations, the population attributable risk refers to an increase in the population occurrence of the disease in question. All estimates of incidence rate ratio were adjusted for age, year of birth, and gender.

**Table S2.** Mean, minimum, and maximum values of the Normalized Difference Vegetation Index (NDVI) within each urbanization category for all four quadratic presence zone sizes around place of residence

| Urbanization category         | NDVI |       |      |
|-------------------------------|------|-------|------|
|                               | Mean | Min   | Max  |
| <b>210×210m (7×7 cells)</b>   |      |       |      |
| Capital center                | 0.25 | -0.72 | 0.75 |
| Capital suburb                | 0.38 | -0.73 | 0.82 |
| Provincial city               | 0.34 | -0.72 | 0.82 |
| Provincial town               | 0.36 | -0.75 | 0.85 |
| Rural                         | 0.43 | -0.74 | 0.89 |
| <b>330×330m (11×11 cells)</b> |      |       |      |
| Capital center                | 0.25 | -0.70 | 0.76 |
| Capital suburb                | 0.38 | -0.68 | 0.82 |
| Provincial city               | 0.35 | -0.68 | 0.84 |
| Provincial town               | 0.37 | -0.72 | 0.84 |
| Rural                         | 0.44 | -0.73 | 0.84 |
| <b>570×570m (19×19 cells)</b> |      |       |      |
| Capital center                | 0.26 | -0.68 | 0.75 |
| Capital suburb                | 0.39 | -0.64 | 0.81 |
| Provincial city               | 0.36 | -0.68 | 0.83 |
| Provincial town               | 0.38 | -0.72 | 0.84 |
| Rural                         | 0.45 | -0.69 | 0.86 |
| <b>930×930m (31×31 cells)</b> |      |       |      |
| Capital center                | 0.26 | -0.65 | 0.75 |
| Capital suburb                | 0.40 | -0.56 | 0.79 |
| Provincial city               | 0.37 | -0.63 | 0.80 |

|                 |      |       |      |
|-----------------|------|-------|------|
| Provincial town | 0.39 | -0.64 | 0.81 |
| Rural           | 0.46 | -0.62 | 0.81 |

---

NDVI: The normalized difference vegetation index; Min: Minimum; Max: Maximum.

Data were split between each of the five urbanization classes (Capital center N = 56 650, Capital suburb N = 124 193, Provincial city N= 90 648, Provincial town N = 265 570, and Rural N = 376 525). Mean, minimum, and maximum values of NDVI were calculated for mean NDVI measured at 210×210m, 330×330m, 570×570m, and 930×930m size quadrats around each individual's residence.

**Table S3** Number and proportion of cases diagnosed in each year of adolescence

| Psychiatric disorder                            | Age 13        | Age 14        | Age 15        | Age 16        | Age 17        | Age 18        | Age 19        |
|-------------------------------------------------|---------------|---------------|---------------|---------------|---------------|---------------|---------------|
| Any psychiatric disorder                        | 21 792 (20.3) | 30 433 (28.4) | 39 981 (37.3) | 48 844 (45.6) | 57 424 (53.6) | 65 581 (61.2) | 73 151 (68.3) |
| Substance abuse                                 | 71 (0.6)      | 306 (2.5)     | 827 (6.7)     | 1610 (13.0)   | 2708 (21.8)   | 4085 (32.9)   | 5615 (45.2)   |
| Alcohol                                         | 8 (0.2)       | 35 (1.1)      | 113 (3.5)     | 216 (6.7)     | 371 (11.5)    | 673 (20.9)    | 1036 (32.2)   |
| Cannabis                                        | 36 (0.5)      | 182 (2.6)     | 501 (7.1)     | 958 (13.5)    | 1590 (22.4)   | 2385 (33.6)   | 3234 (45.5)   |
| Schizophrenia and related disorders             | 518 (4.7)     | 1072 (9.8)    | 1790 (16.3)   | 2536 (23.0)   | 3391 (30.9)   | 4487 (40.9)   | 5586 (50.9)   |
| Schizophrenia                                   | 67 (1.2)      | 233 (4.3)     | 437 (8.0)     | 676 (12.4)    | 1009 (18.6)   | 1646 (30.3)   | 2267 (41.7)   |
| Schizoaffective disorder                        | 7 (1.7)       | 14 (3.4)      | 34 (8.1)      | 67 (16.0)     | 98 (23.4)     | 142 (34.0)    | 175 (41.9)    |
| Mood disorders                                  | 1730 (5.9)    | 3209 (10.9)   | 5338 (18.2)   | 7652 (26.0)   | 10 216 (34.7) | 12 814 (43.6) | 15 480 (52.6) |
| Bipolar disorder                                | 24 (0.9)      | 70 (2.6)      | 142 (5.3)     | 242 (9.1)     | 388 (14.6)    | 552 (20.7)    | 758 (28.5)    |
| Recurrent depressive disorder                   | 108 (1.3)     | 198 (2.3)     | 362 (4.3)     | 598 (7.1)     | 887 (10.5)    | 1499 (17.7)   | 2239 (26.5)   |
| Single and recurrent depressive disorder        | 1619 (6.0)    | 3010 (11.2)   | 5020 (18.6)   | 7198 (26.7)   | 9596 (35.6)   | 12 038 (44.6) | 14 485 (53.7) |
| Neurotic, stress-related, and somatic disorders | 7179 (12.8)   | 11 490 (20.4) | 16 517 (29.4) | 21 402 (38.1) | 26 206 (46.6) | 30 683 (54.6) | 35 059 (62.4) |
| Obsessive compulsive disorder                   | 1795 (25.0)   | 2403 (33.4)   | 2948 (40.9)   | 3462 (48.1)   | 3906 (54.2)   | 4312 (59.9)   | 4743 (65.9)   |
| Eating disorders                                | 1413 (14.0)   | 2437 (24.4)   | 3579 (35.8)   | 4325 (46.2)   | 5568 (55.6)   | 6416 (64.1)   | 7117 (71.1)   |
| Anorexia nervosa                                | 737 (21.0)    | 1184 (34.3)   | 1636 (47.4)   | 2001 (58.0)   | 2304 (66.8)   | 2576 (74.6)   | 2763 (80.1)   |
| Specific personality disorders                  | 221 (1.3)     | 667 (4.1)     | 1427 (8.7)    | 2404 (14.6)   | 3579 (21.7)   | 5374 (32.6)   | 7227 (43.9)   |
| Borderline type                                 | 74 (1.2)      | 241 (3.9)     | 491 (8.0)     | 810 (13.2)    | 1203 (19.6)   | 1817 (29.6)   | 2549 (41.6)   |
| Intellectual disability                         | 1412 (29.5)   | 1892 (39.5)   | 2393 (50.0)   | 2834 (59.2)   | 3174 (66.3)   | 3443 (71.9)   | 3705 (77.4)   |

Each column shows the number of persons diagnosed at that age or younger with a given psychiatric disorder, and numbers in parentheses show the cumulative proportion of cases diagnosed in a given age group or earlier relative to the total number of cases.

**Table S4** Relative risk of developing a psychiatric disorder from adolescence into adulthood in relation to childhood green space presence (NDVI) within different quadratic presence zone sizes around place of residence

| Psychiatric disorder                           | ICD-10      | Cases   | 210×210m<br>(7×7 cells) |             | 330×330m<br>(11×11 cells) |             | 570×570m<br>(19×19 cells) |             | 930×930m<br>(31×31 cells) |             |
|------------------------------------------------|-------------|---------|-------------------------|-------------|---------------------------|-------------|---------------------------|-------------|---------------------------|-------------|
|                                                |             |         | IRR                     | (95% CI)    | IRR                       | (95% CI)    | IRR                       | (95% CI)    | IRR                       | (95% CI)    |
| Any psychiatric disorder                       | F00-<br>F99 | 107 319 | 1.27                    | (1.24-1.30) | 1.26                      | (1.24-1.29) | 1.26                      | (1.23-1.28) | 1.24                      | (1.21-1.26) |
| Substance abuse                                | F10-<br>F19 | 13 079  | 1.37                    | (1.29-1.46) | 1.36                      | (1.28-1.45) | 1.36                      | (1.28-1.44) | 1.34                      | (1.26-1.42) |
| Alcohol abuse                                  | F10         | 3367    | 1.30                    | (1.16-1.47) | 1.31                      | (1.16-1.48) | 1.32                      | (1.17-1.49) | 1.33                      | (1.18-1.50) |
| Cannabis abuse                                 | F12         | 7526    | 1.33                    | (1.23-1.44) | 1.32                      | (1.22-1.43) | 1.31                      | (1.21-1.42) | 1.30                      | (1.20-1.40) |
| Schizophrenia and related disorders            | F20-<br>F29 | 11 675  | 1.19                    | (1.11-1.26) | 1.19                      | (1.12-1.27) | 1.19                      | (1.11-1.27) | 1.17                      | (1.10-1.25) |
| Schizophrenia                                  | F20         | 5701    | 1.19                    | (1.09-1.30) | 1.18                      | (1.08-1.29) | 1.17                      | (1.07-1.29) | 1.16                      | (1.06-1.27) |
| Schizoaffective disorder                       | F25         | 426     | 1.16                    | (0.84-1.61) | 1.12                      | (0.81-1.55) | 1.00                      | (0.72-1.40) | 0.95                      | (0.68-1.32) |
| Mood disorders                                 | F30-<br>F39 | 30 371  | 1.26                    | (1.21-1.30) | 1.25                      | (1.21-1.30) | 1.24                      | (1.20-1.29) | 1.22                      | (1.18-1.27) |
| Bipolar disorder                               | F30-<br>F31 | 2741    | 1.17                    | (1.03-1.34) | 1.17                      | (1.03-1.33) | 1.15                      | (1.01-1.32) | 1.13                      | (0.99-1.29) |
| Recurrent depressive disorder                  | F33         | 8694    | 1.14                    | (1.06-1.23) | 1.14                      | (1.06-1.22) | 1.12                      | (1.05-1.21) | 1.10                      | (1.02-1.18) |
| Single and recurrent depressive disorder       | F32-<br>F33 | 27 814  | 1.26                    | (1.21-1.32) | 1.26                      | (1.21-1.32) | 1.25                      | (1.20-1.30) | 1.23                      | (1.18-1.28) |
| Neurotic, stress-related and somatic disorders | F40-<br>F48 | 58 358  | 1.33                    | (1.29-1.37) | 1.32                      | (1.29-1.36) | 1.31                      | (1.28-1.35) | 1.29                      | (1.25-1.33) |
| Obsessive compulsive disorder                  | F42         | 7619    | 1.21                    | (1.13-1.31) | 1.23                      | (1.14-1.33) | 1.21                      | (1.12-1.30) | 1.18                      | (1.09-1.28) |
| Eating disorders                               | F50         | 10 187  | 1.18                    | (1.11-1.26) | 1.19                      | (1.11-1.27) | 1.18                      | (1.11-1.26) | 1.18                      | (1.11-1.26) |
| Anorexia nervosa                               | F50.0       | 3505    | 1.11                    | (0.99-1.24) | 1.14                      | (1.02-1.27) | 1.14                      | (1.02-1.27) | 1.12                      | (1.01-1.26) |
| Specific personality disorders                 | F60         | 17 070  | 1.14                    | (1.08-1.20) | 1.12                      | (1.06-1.18) | 1.11                      | (1.05-1.17) | 1.10                      | (1.04-1.16) |

|                         |             |      |      |             |      |             |      |             |      |             |
|-------------------------|-------------|------|------|-------------|------|-------------|------|-------------|------|-------------|
| Borderline type         | F60.31      | 6347 | 1.12 | (1.03-1.22) | 1.10 | (1.01-1.20) | 1.10 | (1.01-1.19) | 1.08 | (0.99-1.18) |
| Intellectual disability | F70-<br>F79 | 5498 | 1.01 | (0.92-1.11) | 1.01 | (0.92-1.11) | 1.01 | (0.92-1.11) | 1.01 | (0.91-1.11) |

NDVI: The normalized difference vegetation index; IRR: Incidence rate ratio; 95% CI: 95% confidence interval. NDVI was calculated

as the mean for a 210×210m, 330×330m, 570×570m, and 930×930m quadrats around each individual's place of residence at age 10.

Estimates of IRRs show the risk of children living at the lowest level of NDVI relative to the reference level (set to the highest decile

of NDVI). IRRs were based on all persons born in Denmark 1985-2003 who lived in Denmark on their 10th birthday (N = 943 027)

and were followed for the development of a psychiatric disorder from 1985 to 2016. The number of persons who developed a given

psychiatric disorder is shown in the column Cases. Separate Cox regressions were fitted for each psychiatric disorder with NDVI fitted

as numeric deciles. All estimates of incidence rate ratio were adjusted for urbanization, parents' socioeconomic status, age, year of

birth, and gender.



**Table S5** ICD10 codes of psychiatric disorders and number of cases

| Psychiatric disorder                           | Code                                      | Cases   |
|------------------------------------------------|-------------------------------------------|---------|
| Any psychiatric disorder                       | ICD10: F00-F99 and equivalent ICD-8 codes | 107 112 |
| Substance abuse                                | ICD10: F10-F19 and equivalent ICD-8 codes | 12 425  |
| Alcohol                                        | ICD10: F10 and equivalent ICD-8 codes     | 3 214   |
| Cannabis                                       | ICD10: F12 and equivalent ICD-8 codes     | 7 101   |
| Schizophrenia and related disorders            | ICD10: F20-F29 and equivalent ICD-8 codes | 10 977  |
| Schizophrenia                                  | ICD10: F20 and equivalent ICD-8 codes     | 5 437   |
| Schizoaffective disorder                       | ICD10: F25 and equivalent ICD-8 codes     | 418     |
| Mood disorders                                 | ICD10: F30-F39 and equivalent ICD-8 codes | 29 410  |
| Bipolar disorder                               | ICD10: F30-F31 and equivalent ICD-8 codes | 2 661   |
| Recurrent depressive disorder                  | ICD10: F33 and equivalent ICD-8 codes     | 8 455   |
| Single and recurrent depressive disorder       | ICD10: F32-F33 and equivalent ICD-8 codes | 26 962  |
| Neurotic, stress-related and somatic disorders | ICD10: F40-F48 and equivalent ICD-8 codes | 56 205  |
| Obsessive compulsive disorder                  | ICD10: F42 and equivalent ICD-8 codes     | 7 201   |
| Eating disorders                               | ICD10: F50 and equivalent ICD-8 codes     | 10 008  |
| Anorexia nervosa                               | ICD10: F50.0 and equivalent ICD-8 codes   | 3 451   |
| Specific personality disorders                 | ICD10: F60 and equivalent ICD-8 codes     | 16 476  |
| Borderline type                                | ICD10: F60.31 and equivalent ICD-8 codes  | 6 133   |
| Intellectual disability                        | ICD10: F70-79 and equivalent ICD-8 codes  | 4 787   |

Cases show the number of individuals in the study population diagnosed with a given disorder

**Table S6.** Overview of Landsat satellite data used to calculate green space presence as the normalized difference vegetation index (NDVI) for Denmark.

| Year | Satellite   | Number of scenes | Resolution | RED band | NIR band |
|------|-------------|------------------|------------|----------|----------|
| 2013 | L8 OLI/TIRS | 12               | 30m        | 4        | 5        |
| 2012 | L4-5 MS     | 19               | 30m        | 3        | 4        |
| 2011 | L4-5 TM     | 12               | 30m        | 3        | 4        |
| 2010 | L4-5 TM     | 14               | 30m        | 3        | 4        |
| 2009 | L4-5 TM     | 11               | 30m        | 3        | 4        |
| 2008 | -           | -                | -          | -        | -        |
| 2007 | L4-5 TM     | 7                | 30m        | 3        | 4        |
| 2006 | L4-5 TM     | 13               | 30m        | 3        | 4        |
| 2005 | L4-5 TM     | 12               | 30m        | 3        | 4        |
| 2004 | L4-5 TM     | 14               | 30m        | 3        | 4        |
| 2003 | L4-5 TM     | 13               | 30m        | 3        | 4        |
| 2002 | L7 ETM+     | 15               | 30m        | 3        | 4        |
| 2001 | L7 ETM+     | 11               | 30m        | 3        | 4        |
| 2000 | L7 ETM+     | 11               | 30m        | 3        | 4        |
| 1999 | L7 ETM+     | 13               | 30m        | 3        | 4        |
| 1998 | L4-5 TM     | 12               |            | 3        | 4        |
| 1997 | -           | -                | -          | -        | -        |
| 1996 | -           | -                | -          | -        | -        |
| 1995 | -           | -                | -          | -        | -        |
| 1994 | -           | -                | -          | -        | -        |

|      |         |    |   |   |   |
|------|---------|----|---|---|---|
| 1993 | -       | -  | - | - | - |
| 1992 | -       | -  | - | - | - |
| 1991 | -       | -  | - | - | - |
| 1990 | L4-5 TM | 14 |   | 3 | 4 |
| 1989 | L4-5 TM | 13 |   | 3 | 4 |
| 1988 | L4-5 TM | 19 |   | 3 | 4 |
| 1987 | L4-5 TM | 12 |   | 3 | 4 |
| 1986 | L4-5 TM | 19 |   | 3 | 4 |
| 1985 | L4-5 TM | 13 |   | 3 | 4 |

---

NDVI: The normalized difference vegetation index; RED: the red band capturing reflectance within 0.63-0.69 wavelength (micrometers); NIR: the near-infrared band capturing reflectance within 0.76-0.90 wavelength (micrometers). NDVI is calculated as the difference between light absorbed (RED) and reflected (NIR) by vegetation. Settings for sensors differ slightly between different satellites and more details can be found at the U.S. Geological Survey homepage (<https://landsat.usgs.gov/what-are-band-designations-landsat-satellites>).

**Table S7.** Cut-off values of mean and cumulated normalized difference vegetation index (NDVI)

| Decile         | 210×210m<br>(7×7 cells) |      | 330×330m<br>(11×11 cells) |      | 570×570m<br>(19×19 cells) |      | 930×930m<br>(31×31 cells) |      |
|----------------|-------------------------|------|---------------------------|------|---------------------------|------|---------------------------|------|
|                | Min                     | Max  | Min                       | Max  | Min                       | Max  | Min                       | Max  |
| NDVI age 10    |                         |      |                           |      |                           |      |                           |      |
| 0.0            | -0.75                   | 0.04 | -0.73                     | 0.07 | -0.72                     | 0.10 | -0.65                     | 0.12 |
| 0.1            | 0.04                    | 0.22 | 0.07                      | 0.24 | 0.10                      | 0.26 | 0.12                      | 0.27 |
| 0.2            | 0.22                    | 0.32 | 0.24                      | 0.33 | 0.26                      | 0.34 | 0.27                      | 0.35 |
| 0.3            | 0.32                    | 0.39 | 0.33                      | 0.39 | 0.34                      | 0.40 | 0.35                      | 0.40 |
| 0.4            | 0.39                    | 0.44 | 0.39                      | 0.44 | 0.40                      | 0.45 | 0.40                      | 0.45 |
| 0.6            | 0.44                    | 0.48 | 0.44                      | 0.49 | 0.45                      | 0.49 | 0.45                      | 0.50 |
| 0.7            | 0.48                    | 0.53 | 0.49                      | 0.53 | 0.49                      | 0.54 | 0.50                      | 0.54 |
| 0.8            | 0.53                    | 0.57 | 0.53                      | 0.58 | 0.54                      | 0.58 | 0.54                      | 0.59 |
| 0.9            | 0.57                    | 0.63 | 0.58                      | 0.63 | 0.58                      | 0.63 | 0.59                      | 0.63 |
| 1.0            | 0.63                    | 0.89 | 0.63                      | 0.85 | 0.63                      | 0.86 | 0.63                      | 0.83 |
| NDVI cumulated |                         |      |                           |      |                           |      |                           |      |
|                | Min                     | Max  | Min                       | Max  | Min                       | Max  | Min                       | Max  |
| 0.0            | -0.56                   | 0.07 | -0.5                      | 0.09 | -0.39                     | 0.12 | -0.34                     | 0.14 |
| 0.1            | 0.07                    | 0.18 | 0.09                      | 0.19 | 0.12                      | 0.21 | 0.14                      | 0.23 |
| 0.2            | 0.18                    | 0.25 | 0.19                      | 0.26 | 0.21                      | 0.28 | 0.23                      | 0.29 |
| 0.3            | 0.25                    | 0.31 | 0.26                      | 0.32 | 0.28                      | 0.33 | 0.29                      | 0.35 |
| 0.4            | 0.31                    | 0.36 | 0.32                      | 0.37 | 0.33                      | 0.38 | 0.35                      | 0.39 |
| 0.6            | 0.36                    | 0.40 | 0.37                      | 0.41 | 0.38                      | 0.42 | 0.39                      | 0.43 |
| 0.7            | 0.40                    | 0.44 | 0.41                      | 0.45 | 0.42                      | 0.46 | 0.43                      | 0.46 |
| 0.8            | 0.44                    | 0.48 | 0.45                      | 0.49 | 0.46                      | 0.49 | 0.46                      | 0.50 |
| 0.9            | 0.48                    | 0.53 | 0.49                      | 0.53 | 0.49                      | 0.54 | 0.50                      | 0.54 |
| 1.0            | 0.53                    | 0.79 | 0.53                      | 0.76 | 0.54                      | 0.76 | 0.54                      | 0.72 |

NDVI: The normalized difference vegetation index; Min: Minimum; Max: Maximum.

NDVI age 10 was calculated as the mean for 210×210m, 330×330m, 570×570m, and 930×930m quadrats around each individual's place of residence at the 10<sup>th</sup> birthday (N = 943 027). NDVI cumulated was calculated at place of residence as the mean of NDVI for each year from birth to the 10<sup>th</sup> birthday (N = 904 295). For each measure of NDVI, values were reclassified as deciles in classes of ten and cut-off values show the minimum and maximum values of NDVI within each decile.

**Table S8.** Associations by gender between green space measured as the normalized difference vegetation index (NDVI) and incidence rate ratio of psychiatric disorders.

| Psychiatric disorder                           | Overall |             | Male |             | Female |             |
|------------------------------------------------|---------|-------------|------|-------------|--------|-------------|
|                                                | IRR     | (95% CI)    | IRR  | (95% CI)    | IRR    | (95% CI)    |
| Any psychiatric disorder                       | 1.32    | (1.29-1.35) | 1.29 | (1.25-1.32) | 1.35   | (1.31-1.38) |
| Substance abuse                                | 1.52    | (1.43-1.60) | 1.47 | (1.38-1.58) | 1.61   | (1.46-1.77) |
| Alcohol abuse                                  | 1.41    | (1.27-1.58) | 1.40 | (1.22-1.61) | 1.43   | (1.20-1.72) |
| Cannabis abuse                                 | 1.55    | (1.44-1.67) | 1.52 | (1.39-1.66) | 1.62   | (1.42-1.84) |
| Schizophrenia and related disorders            | 1.38    | (1.30-1.46) | 1.32 | (1.22-1.43) | 1.44   | (1.33-1.57) |
| Schizophrenia                                  | 1.33    | (1.22-1.44) | 1.37 | (1.22-1.54) | 1.28   | (1.13-1.44) |
| Schizoaffective disorder                       | 1.31    | (0.97-1.79) | 1.38 | (0.82-2.31) | 1.28   | (0.88-1.88) |
| Mood disorders                                 | 1.33    | (1.28-1.38) | 1.34 | (1.26-1.43) | 1.32   | (1.27-1.38) |
| Bipolar disorder                               | 1.31    | (1.16-1.48) | 1.44 | (1.18-1.75) | 1.25   | (1.07-1.45) |
| Recurrent depressive disorder                  | 1.19    | (1.11-1.27) | 1.19 | (1.05-1.34) | 1.19   | (1.10-1.29) |
| Single and recurrent depressive disorder       | 1.34    | (1.29-1.39) | 1.33 | (1.24-1.42) | 1.34   | (1.28-1.40) |
| Neurotic, stress-related and somatic disorders | 1.39    | (1.36-1.43) | 1.33 | (1.28-1.39) | 1.43   | (1.39-1.48) |
| Obsessive compulsive disorder                  | 1.31    | (1.22-1.40) | 1.29 | (1.15-1.46) | 1.31   | (1.20-1.44) |
| Eating disorders                               | 1.25    | (1.17-1.33) | 1.10 | (0.86-1.41) | 1.26   | (1.18-1.34) |
| Anorexia nervosa                               | 1.15    | (1.03-1.27) | 1.05 | (0.68-1.63) | 1.15   | (1.03-1.29) |
| Specific personality disorders                 | 1.19    | (1.14-1.25) | 1.27 | (1.16-1.40) | 1.17   | (1.11-1.24) |
| Borderline type                                | 1.21    | (1.11-1.31) | 1.06 | (0.80-1.41) | 1.22   | (1.12-1.32) |
| Intellectual disability                        | 1.06    | (0.97-1.15) | 1.03 | (0.92-1.15) | 1.10   | (0.96-1.25) |

NDVI: The normalized difference vegetation index; IRR: Incidence rate ratio; 95% CI: 95% confidence interval. Estimates of IRRs show the risk of children living at the lowest decile of NDVI relative to the highest decile of NDVI. NDVI was calculated as the mean for a 210×210m quadrat around each individual's place of residence at age 10. Estimates of IRRs were based on all persons born in

Denmark 1985-2003 who lived in Denmark on their 10th birthday (N = 943 027) who were followed for the development of a psychiatric disorder from 1985 to 2016. Two separate Cox regressions were fitted for each psychiatric disorder: 1) results in the Overall column provide the associations with NDVI fitted as numeric deciles and 2) results in the Male and Female columns provide the association with NDVI for each gender separately. All estimates of incidence rate ratio were adjusted for age, year of birth, and gender.
